# Supplementary material for: Social support helps protect against perinatal bonding failure and depression among mothers: a prospective cohort study
Source: PubMed Central journal article supplement (PMC5572740; doi:10.1038/s41598-017-08768-3), 2017-08-25
Supplement: 41598_2017_8768_MOESM1_ESM.pdf [file 41598_2017_8768_MOESM1_ESM.pdf]

1 **Social support helps protect against perinatal bonding failure and depression among**  
2 **mothers: a prospective cohort study – Supplementary Information**

3

4 Masako Ohara<sup>1)</sup>, Takashi Okada<sup>1)\*</sup>, Branko Aleksic<sup>1)</sup>, Mako Morikawa<sup>1)</sup>, Chika Kubota<sup>1)</sup>,  
5 Yukako Nakamura<sup>1)</sup>, Tomoko Shiino<sup>1)</sup>, Aya Yamauchi<sup>1)</sup>, Yota Uno<sup>1)</sup>, Satomi Murase<sup>1)</sup>, Setsuko  
6 Goto<sup>2)</sup>, Atsuko Kanai<sup>3)</sup>, Tomoko Masuda<sup>4)</sup>, Masahiro Nakatochi<sup>5)</sup>, Masahiko Ando<sup>5)</sup>, and Norio  
7 Ozaki<sup>1)</sup>

8

9 1) Department of Psychiatry, Nagoya University Graduate School of Medicine, Nagoya, Japan

10 2) Sugiyama Jogakuen University, Nagoya, Japan

11 3) Graduate School of Education and Human Development, Nagoya University, Nagoya, Japan

12 4) Graduate School of Law, Nagoya University, Nagoya, Japan

13 5) Center for Advanced Medicine and Clinical Research, Nagoya University Hospital, Nagoya,  
14 Japan

15

16 \*Corresponding author

17 Takashi Okada, M.D., Ph.D.

18 Department of Psychiatry, Nagoya University Graduate School of Medicine

19 65 Tsurumai-cho, Showa-ku, Nagoya, Aichi 466-8550, Japan

20 E-mail: [okada@med.nagoya-u.ac.jp](mailto:okada@med.nagoya-u.ac.jp)

21 Tel: +81-52-744-2282, Fax: +81-52-744-2293

- 1 **Table of contents**
- 2 Supplementary Table S1. Demographic characteristics of included and all mothers

1 **Supplementary Table S1. Demographic characteristics of included and all mothers**

|                       | Included mothers<br>(n= 477-494) |        | all mothers<br>(n= 973-1011) |        | t    | p    |
|-----------------------|----------------------------------|--------|------------------------------|--------|------|------|
|                       | Mean (SD)                        |        | Mean (SD)                    |        |      |      |
| Age (years)           | 32.4                             | (4.5)  | 32.1                         | (4.5)  | 1.13 | 0.65 |
| Number of children    | 0.24                             | (0.53) | 0.25                         | (0.53) | 0.42 | 0.54 |
| Partner's age (years) | 34.7                             | (5.7)  | 34.5                         | (5.8)  | 0.43 | 0.68 |

2

3
